# Supplementary material for: Association between ageing, brain chemistry and white matter volume revealed with complementary MRI and FTIR brain imaging
Source: Royal Society of Chemistry journal article supplement (doi:10.1039/d2an01271e), 2022-01-01
Supplement: d2an01271e1.pdf [file d2an01271e1.pdf]

## Supplementary Information

### Association Between Ageing, Brain Chemistry And White Volume Revealed With Complementary MRI And FTIR Brain Imaging

Virginie Lam,<sup>1,2</sup> Juliette Phillips,<sup>3</sup> Elizabeth Harrild,<sup>3</sup> Rebecca J. Tidy,<sup>3</sup> Ashley L. Hollings,<sup>1,3</sup> Lincoln Codd,<sup>4</sup> Kirsty Richardson,<sup>5</sup> Liesl Celliers,<sup>6</sup> Ryu Takechi,<sup>1,2</sup> John C.L. Mamo,<sup>1,2</sup> Mark J. Hackett<sup>1,3\*</sup>

<sup>1</sup> Curtin Health Innovation Research Institute, Curtin University, Bentley, WA, Australia.

<sup>2</sup> School of Population Health, Faculty of Health Sciences, Curtin University, Bentley, WA, Australia.

<sup>3</sup> School of Molecular and Life Sciences, Faculty of Science and Engineering, Curtin University, Bentley, WA, Australia.

<sup>4</sup> Harry Perkins Institute of Medical Research, Nedlands, WA, Australia.

<sup>5</sup> Department of Radiology, Sir Charles Gairdner Hospital, Nedlands, WA, Australia.

<sup>6</sup> Department of Nuclear Medicine, Sir Charles Gairdner Hospital, Nedlands, WA, Australia.

\*Corresponding author: [mark.j.hackett@curtin.edu.au](mailto:mark.j.hackett@curtin.edu.au)

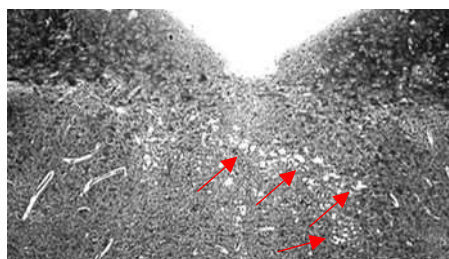

**SI Figure 1:** Representative histology (cresyl violet) showing the typical pattern of vacuolisation (red arrows) associated with spongiform pathology, which has been reported in SAMP8 mice. Image captured at 40x magnification. Image reproduce with permission from John Wiley and Sons, from Figure 3 in the following reference.

Akiguchi, Ichiro, Mercè Pallàs, Herbert Budka, Haruhiko Akiyama, Masaki Ueno, Jingxian Han, Hideo Yagi et al. "SAMP8 mice as a neuropathological model of accelerated brain aging and dementia: Toshio Takeda's legacy and future directions. *Neuropathology* 37, no. 4 (2017): 293-305.

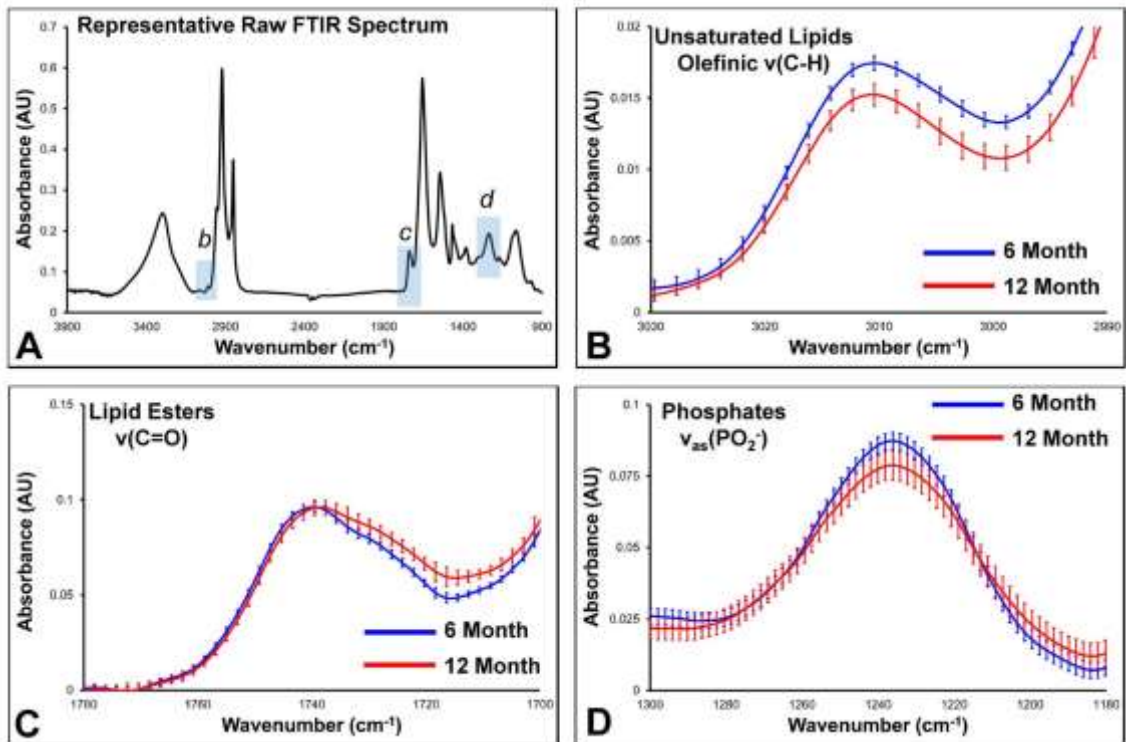

**SI Figure 2:** Average experimental group FTIR spectra of the corpus callosum of 6 month and 12-month-old SAMP8 mice. Entire spectral range (A). Panels B, C, D show enlarged spectral regions of interest, indicated by blue shaded regions in A, marked *b*, *c*, *d*. Spectra indicate decreased levels of unsaturated lipids (B), no decrease in quantity of lipid esters (C), and decreased levels of phosphates (D), when comparing 12 month to 6-month-old mice. Error bars indicate standard deviation.
